# Supplementary material for: Explainable machine learning in outcome prediction of high-grade aneurysmal subarachnoid hemorrhage
Source: publisher site journal article supplement (doi:10.18632/aging.205621), 2024-03-01
Supplement: Supplementary file [file aging-v16i5-205621-supplementary-material-SD1.pdf]

## SUPPLEMENTARY TABLE

**Supplementary Table 1. Confusion matrix of ML and LR models using training and validation cohorts.**

| <b>Cohort</b> | <b>Model</b> | <b>TP</b> | <b>FN</b> | <b>TN</b> | <b>FP</b> | <b>Ba-Acc</b> |
|---------------|--------------|-----------|-----------|-----------|-----------|---------------|
| Training      | LR           | 98        | 43        | 131       | 22        | 0.776         |
|               | XGB          | 130       | 11        | 142       | 11        | 0.925         |
|               | RF           | 132       | 9         | 146       | 7         | 0.945         |
|               | SVM          | 132       | 9         | 127       | 26        | 0.883         |
| Validation    | LR           | 42        | 21        | 59        | 5         | 0.794         |
|               | XGB          | 48        | 15        | 51        | 13        | 0.779         |
|               | RF           | 45        | 18        | 54        | 10        | 0.779         |
|               | SVM          | 54        | 9         | 43        | 21        | 0.765         |

LR indicates logistic regression; SVM, support vector machine; RF, random forest; XGBoost, extreme gradient boosting; TP, true positive; FN, false negative; TN, true negative; FP, false positive; Ba-Acc, balance accuracy.
